# Supplementary material for: Transsynaptic interactions between IgSF proteins DIP-α and Dpr10 are required for motor neuron targeting specificity
Source: eLife journal article supplement (doi:10.7554/elife.42690), 2019-02-04
Supplement: supp [file elife-42690-supp-v1.zip]

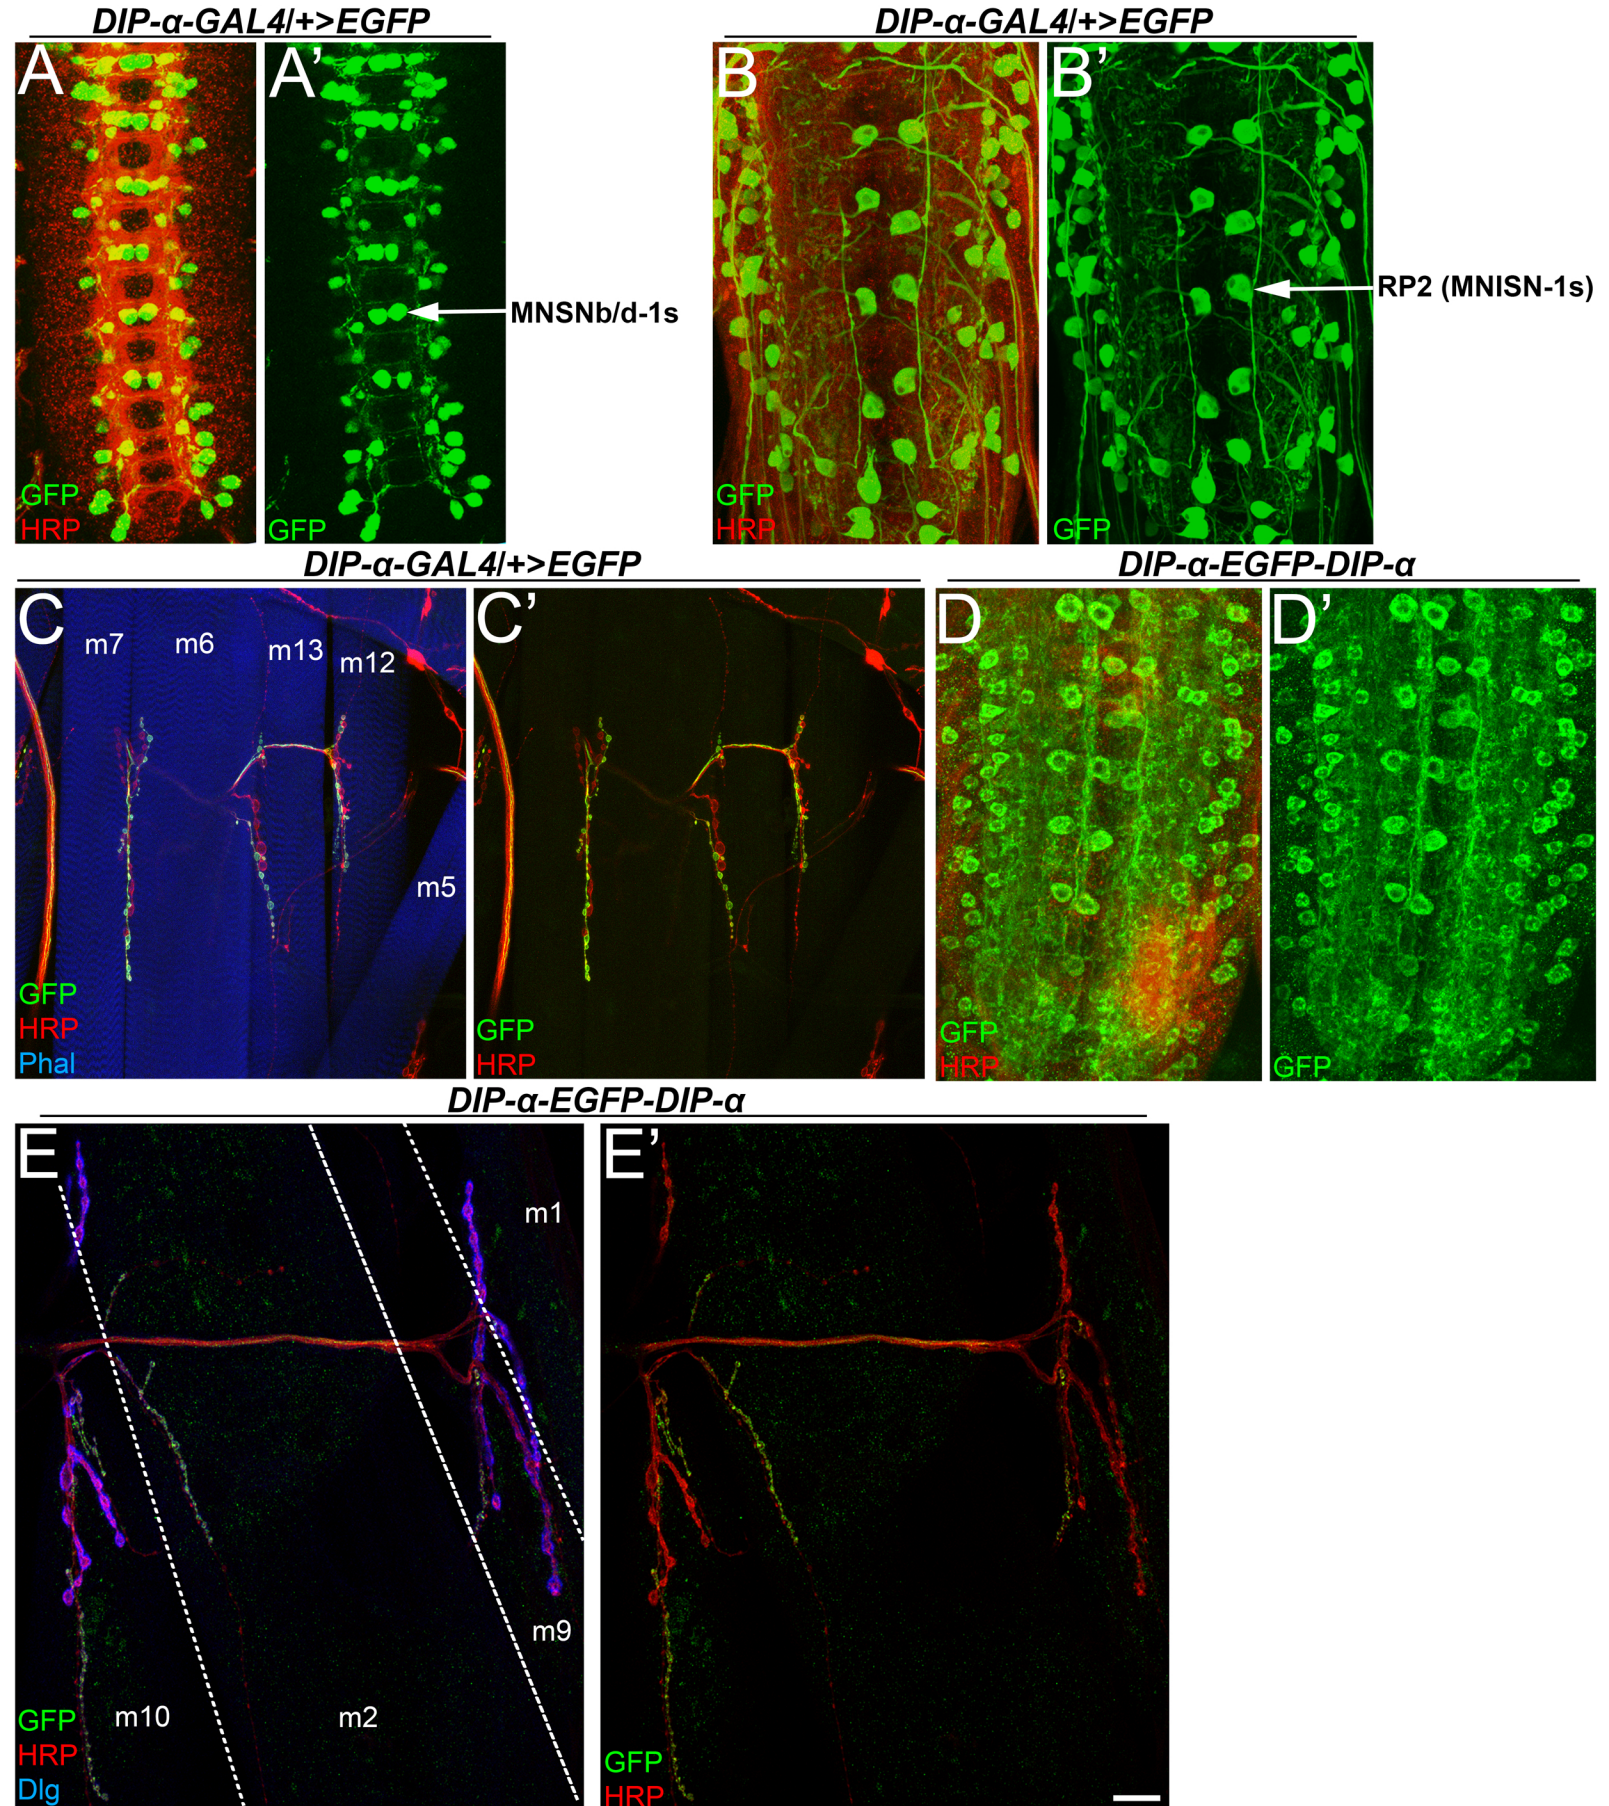

**Figure 1—figure supplement 1. DIP- $\alpha$  is expressed in a subset of VNC neurons and DIP- $\alpha$  protein is enriched in the neuropil.**
