# Supplementary material for: Transsynaptic interactions between IgSF proteins DIP-α and Dpr10 are required for motor neuron targeting specificity
Source: eLife journal article supplement (doi:10.7554/elife.42690), 2019-02-04
Supplement: supp [file elife-42690-supp-v1.zip]

*Dpr10-GAL4>EGFP*

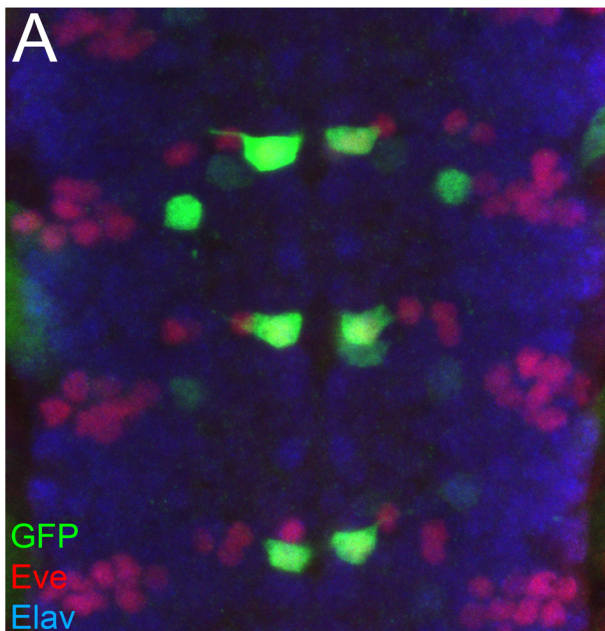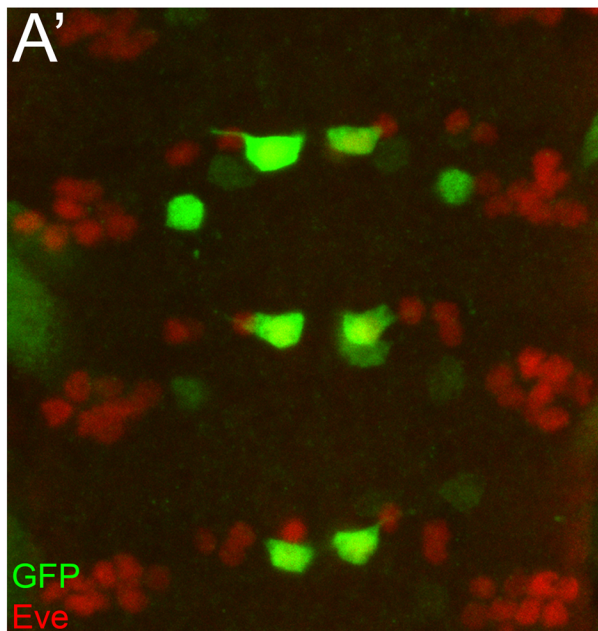

*UAS-Dpr10-V5/+*

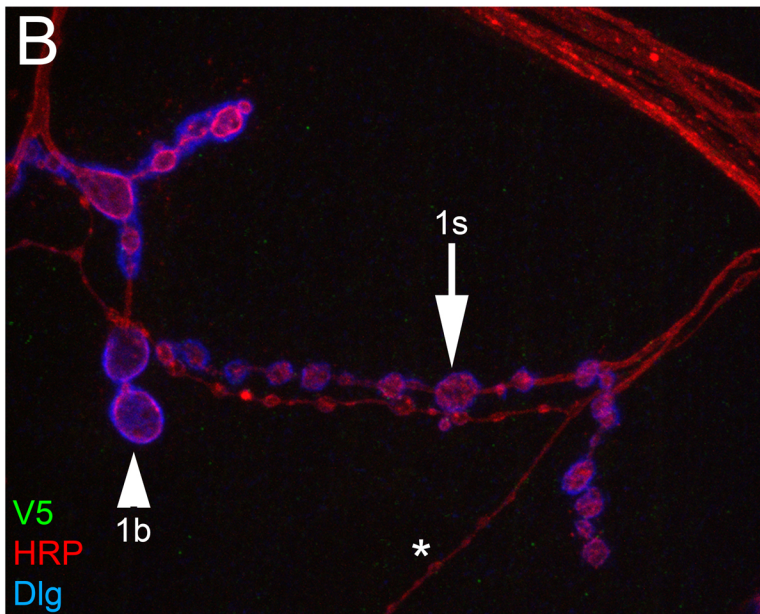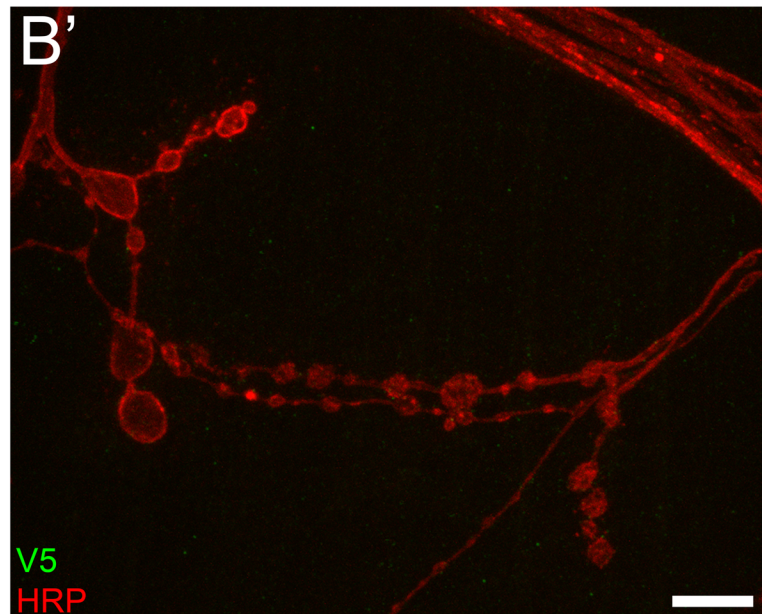

Figure 5— figure supplement 1. Dpr10 is expressed in a subset of neurons in the embryonic ventral nerve cord, and anti-V5 staining in a control sample.
