# Supplementary material for: Transsynaptic interactions between IgSF proteins DIP-α and Dpr10 are required for motor neuron targeting specificity
Source: eLife journal article supplement (doi:10.7554/elife.42690), 2019-02-04
Supplement: supp [file elife-42690-supp-v1.zip]

*DIP-α-GAL4>DIP-α-Myc*

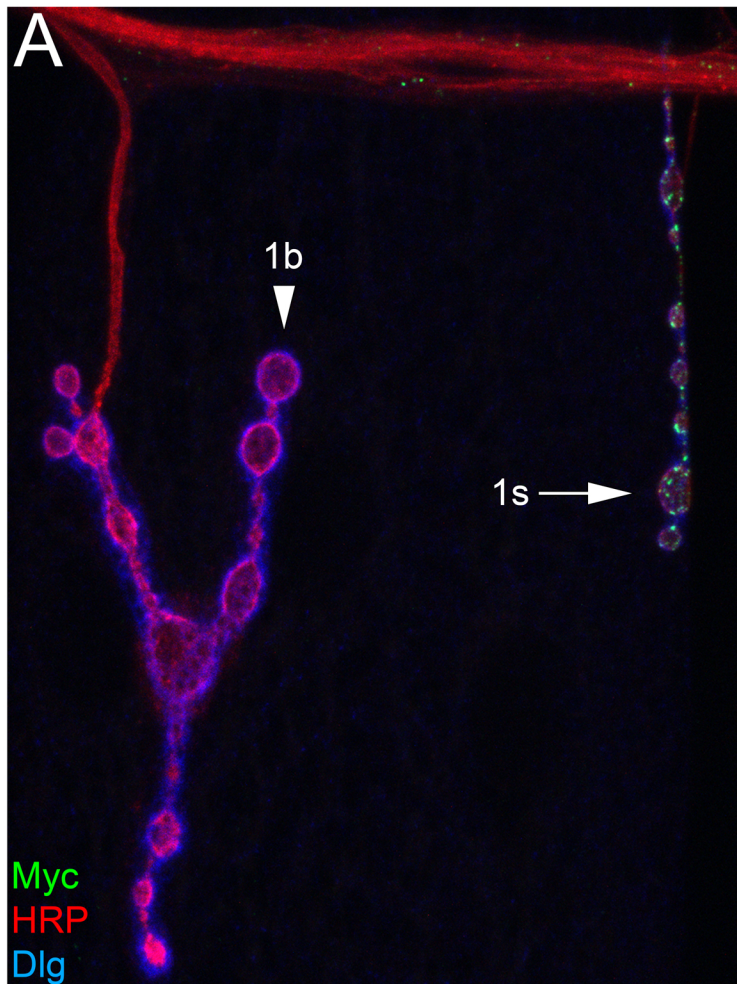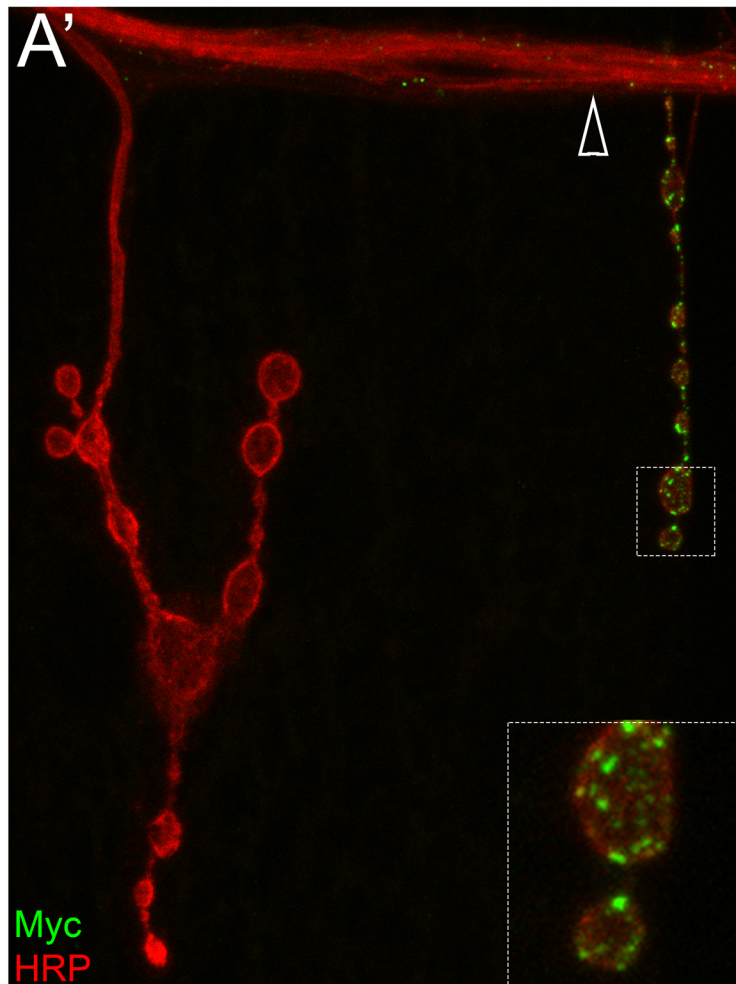

*DIP-α-GAL4>DIP-α-Myc*

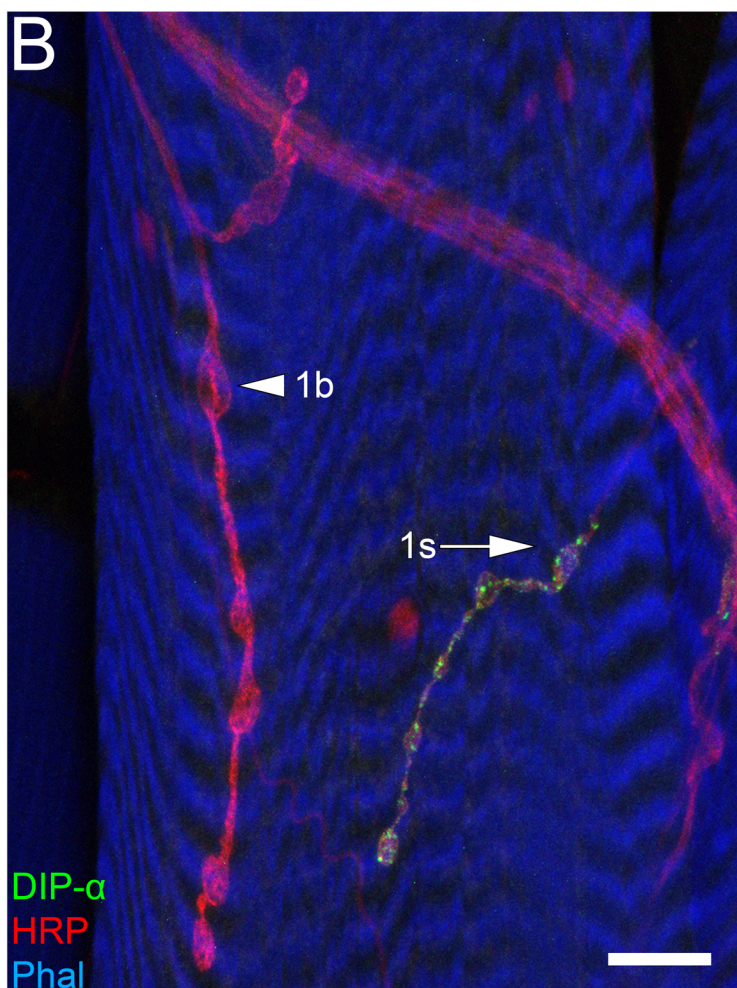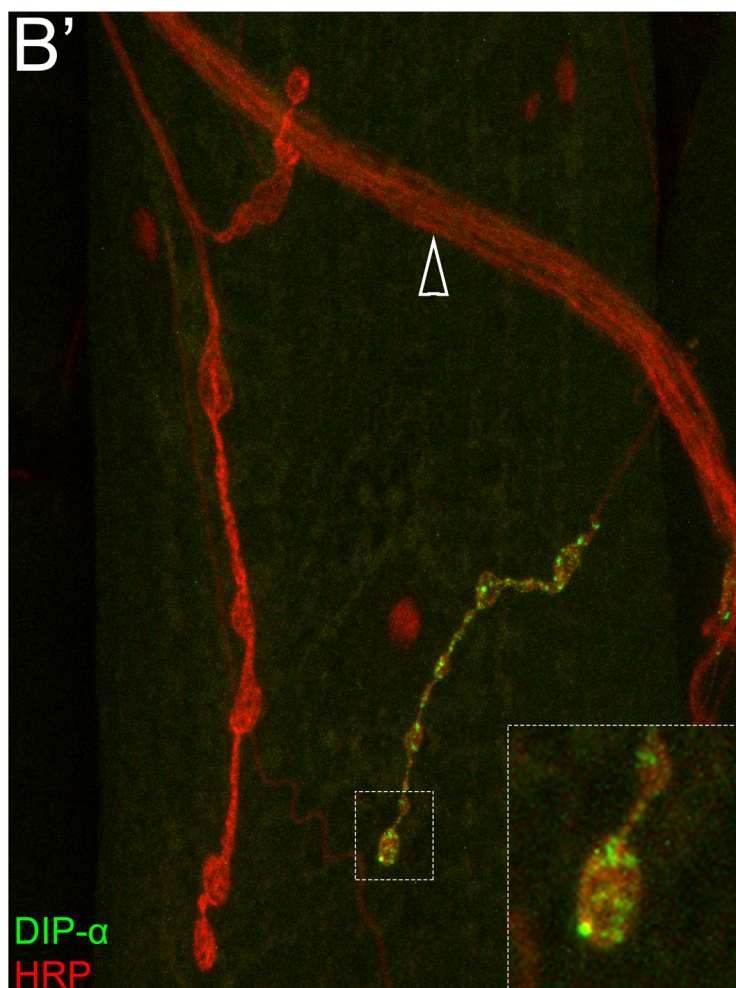

Figure 2—figure supplement 1. DIP-α protein from a transgene localizes normally in rescue animals.
