# Supplementary material for: Transsynaptic interactions between IgSF proteins DIP-α and Dpr10 are required for motor neuron targeting specificity
Source: eLife journal article supplement (doi:10.7554/elife.42690), 2019-02-04
Supplement: supp [file elife-42690-supp-v1.zip]

*DIP-α-GAL4/+>EGFP*

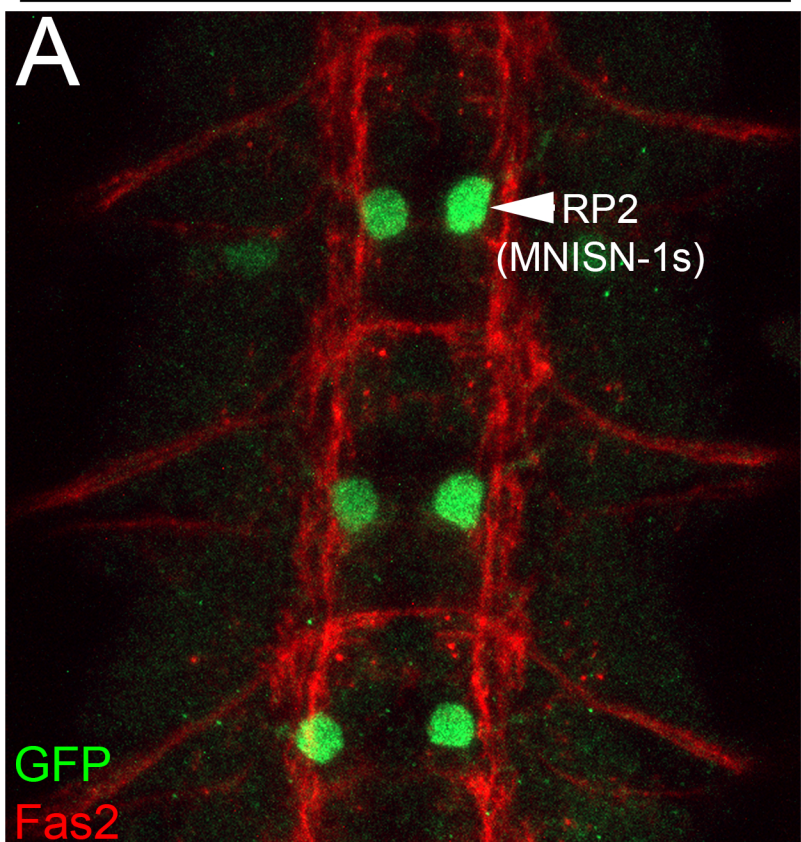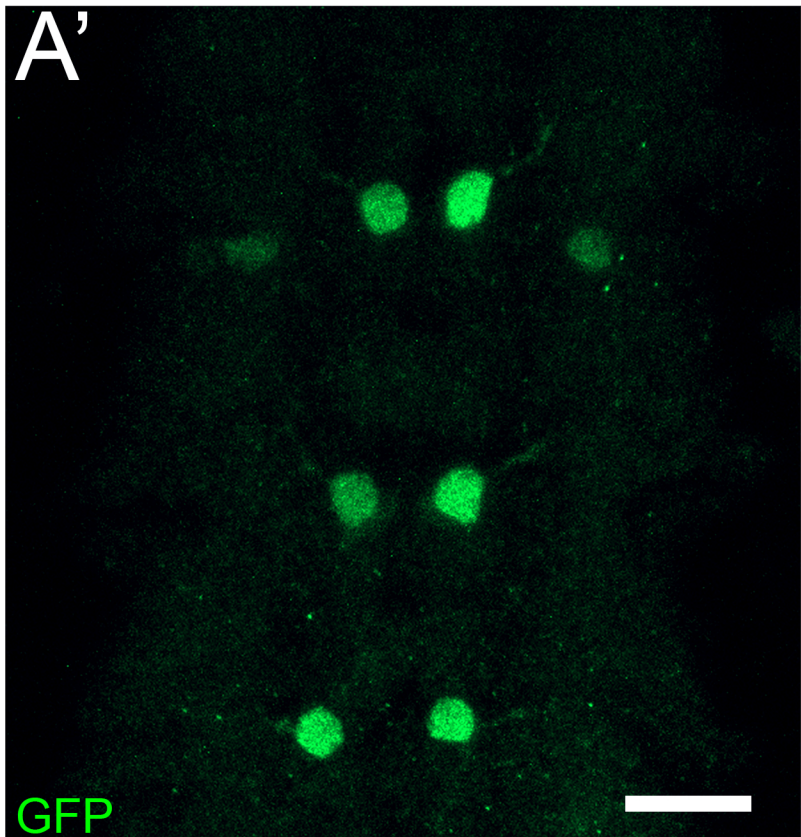

**B**

Frequency of 1s swellings

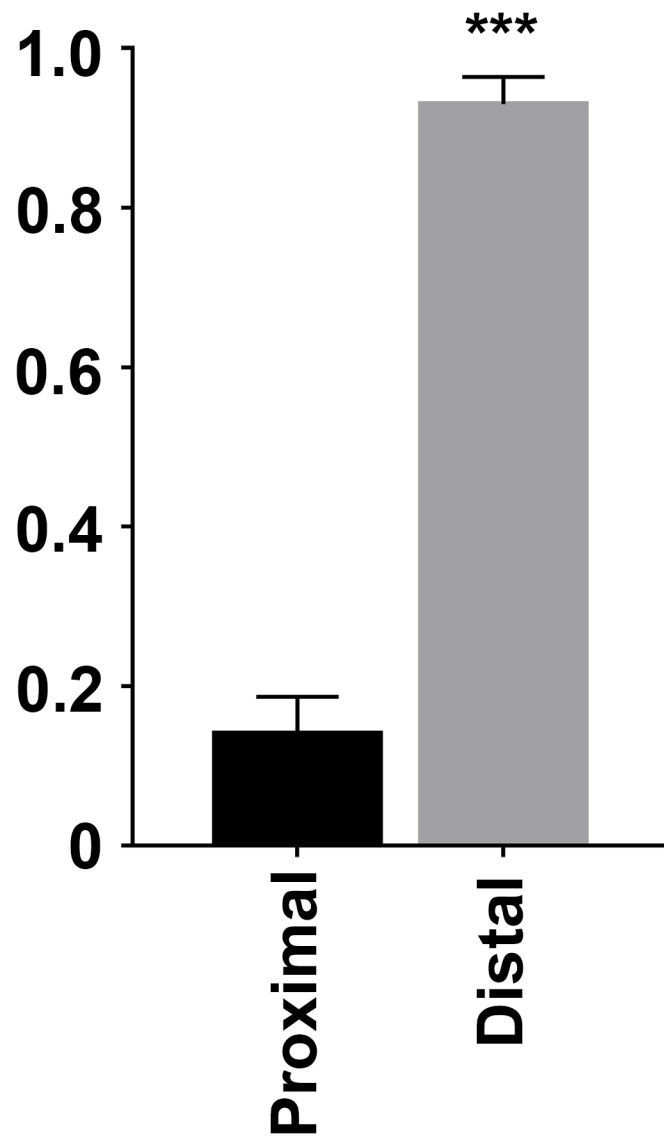

Figure 3— figure supplement 1. DIP- $\alpha$  is expressed in MNISN-1s motor neurons in st14 embryos, and 1s arbors form over distal muscles before proximal.
