# Supplementary figures and images for: Transsynaptic interactions between IgSF proteins DIP-α and Dpr10 are required for motor neuron targeting specificity
Source: eLife journal article supplement (doi:10.7554/elife.42690), 2019-02-04

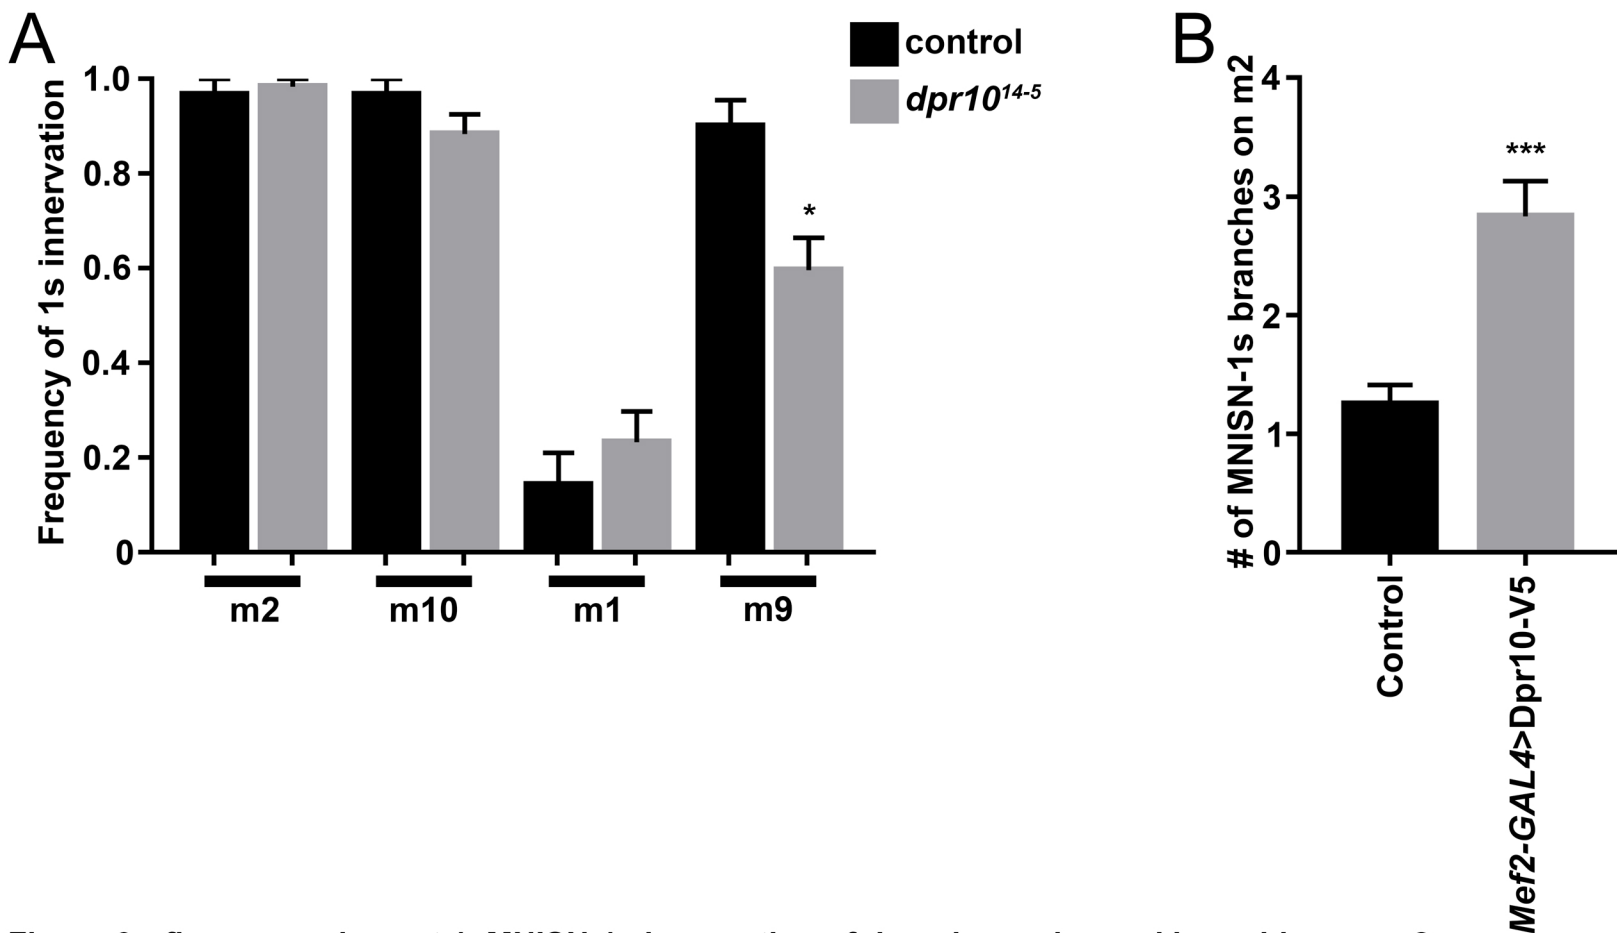

Figure 6—figure supplement 1. MNISN-1s innervation of dorsal muscles and branching on m2.

Supplement: supp [file elife-42690-supp-v1.zip]

**A**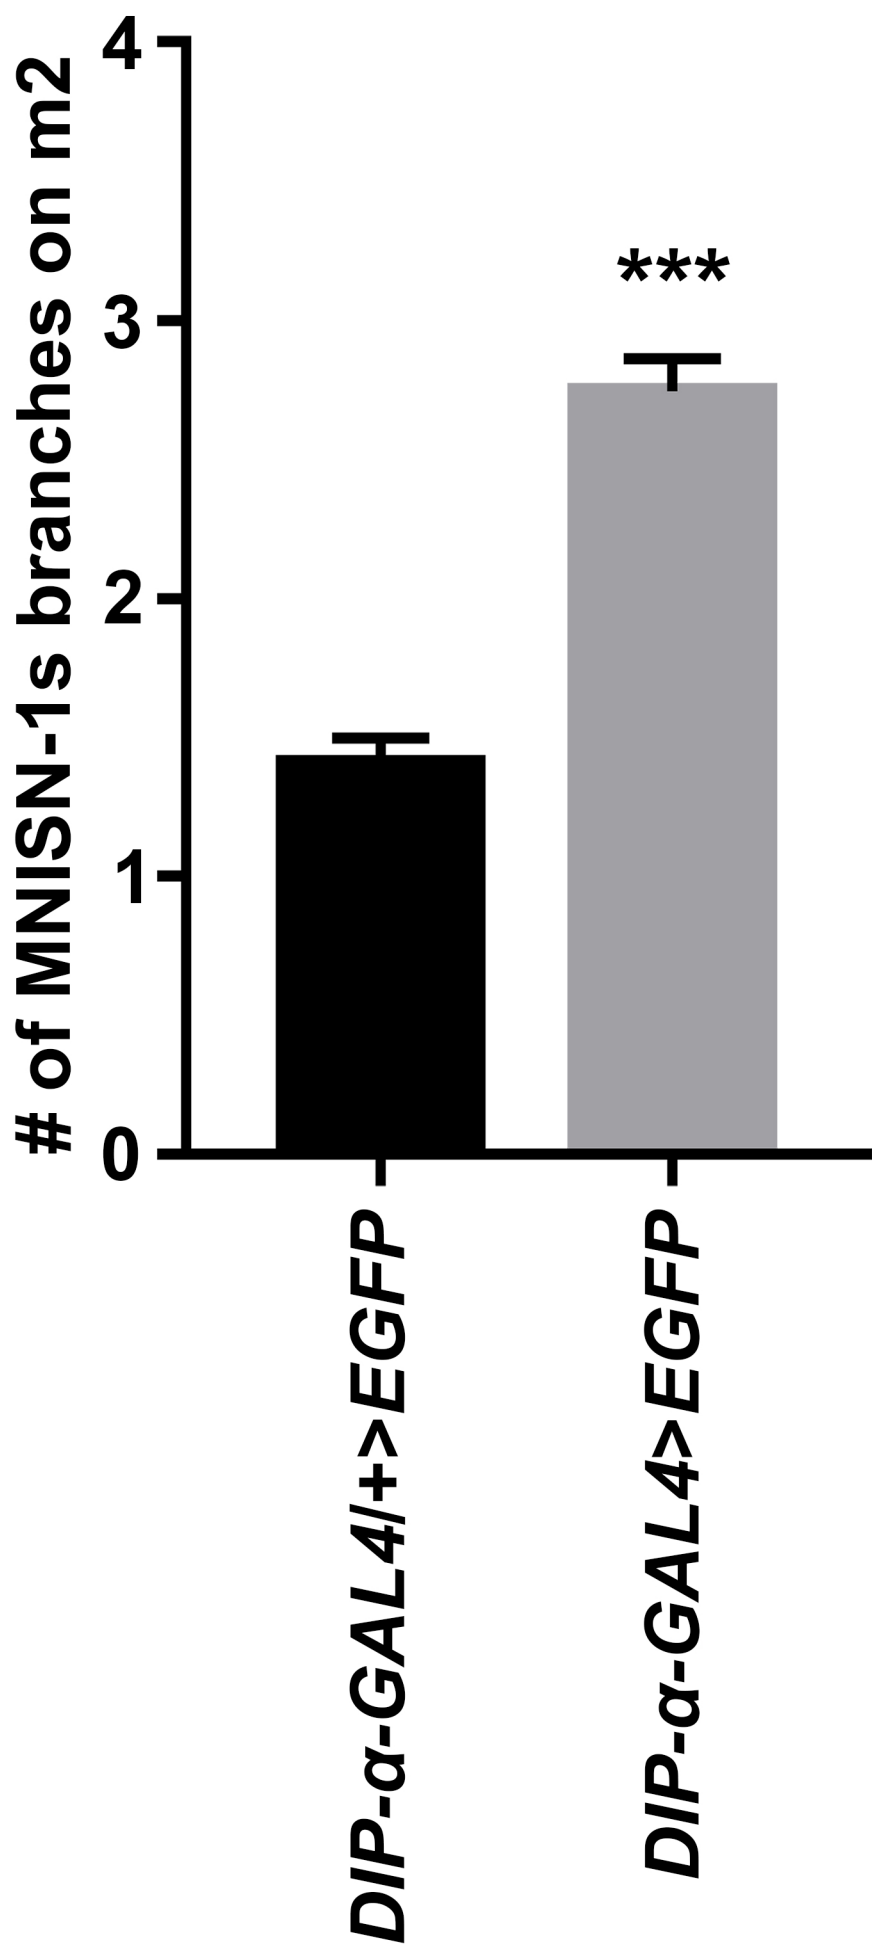

Figure 4— figure supplement 1. Quantification of MNISN-1s arbor branches on m2.

Supplement: supp [file elife-42690-supp-v1.zip]
